# Supplementary material for: Whole-genome and pangenome insights into Mycobacterium colombiense clinical isolates from human infections
Source: PeerJ. 2026 Feb 2;14:e20716. doi: 10.7717/peerj.20716 (PMC12875251; doi:10.7717/peerj.20716)
Supplement: Supplemental Information 2 [file peerj-14-20716-s002.xlsx]

## Sheet: Supplementary Table 1
Supplementary Table 1 Species identification and genetic similarity of Mycobacterium colombiense isolates using NTM Profiler, TYGS, Pathogenwatch, GTDB-Tk, and FastANI.
Sample ID	NTM-Profiler	TYGS				Pathogenwatch	GTDB-Tk	FastANI
	Species	Subject strain	dDDH (d4, in %)	C.I. (d4, in %)	G+C content difference (%)	Organism Name	Classification	ANI
MCO062281265	Mycobacterium colombiense	Mycobacterium colombiense CECT 3035	96	94.6 - 97.0	0.07	Mycobacterium colombiense	Mycobacterium colombiense	99.414
MCO102081859	Mycobacterium colombiense	Mycobacterium colombiense CECT 3035	96.4	95.1 - 97.4	0.01	Mycobacterium colombiense	Mycobacterium colombiense	99.4543
MCO021680268	Mycobacterium colombiense	Mycobacterium colombiense CECT 3035	80.5	77.6 - 83.1	0.11	Mycobacterium colombiense	Mycobacterium colombiense	97.6752
MCO031580717	Mycobacterium colombiense	Mycobacterium colombiense CECT 3035	82.6	79.7 - 85.1	0.23	Mycobacterium colombiense	Mycobacterium colombiense	97.9196
MCO051681085	Mycobacterium colombiense	Mycobacterium colombiense CECT 3035	82.6	79.7 - 85.1	0.23	Mycobacterium colombiense	Mycobacterium colombiense	97.9357
MCO051681160	Mycobacterium colombiense	Mycobacterium colombiense CECT 3035	82.6	79.7 - 85.1	0.23	Mycobacterium colombiense	Mycobacterium colombiense	97.928
MCO051681265	Mycobacterium colombiense	Mycobacterium colombiense CECT 3035	80.5	77.6 - 83.1	0.12	Mycobacterium colombiense	Mycobacterium colombiense	97.6732
MCO061681546	Mycobacterium colombiense	Mycobacterium colombiense CECT 3035	80.5	77.6 - 83.1	0.12	Mycobacterium colombiense	Mycobacterium colombiense	97.6991
MCO061481970	Mycobacterium colombiense	Mycobacterium colombiense CECT 3035	82.6	79.7 - 85.1	0.23	Mycobacterium colombiense	Mycobacterium colombiense	97.9098
MCO061481978	Mycobacterium colombiense	Mycobacterium colombiense CECT 3035	82.6	79.7 - 85.1	0.23	Mycobacterium colombiense	Mycobacterium colombiense	97.9225
MCO101582585	Mycobacterium colombiense	Mycobacterium colombiense CECT 3035	80.5	77.6 - 83.1	0.11	Mycobacterium colombiense	Mycobacterium colombiense	97.6865
MCO121383869	Mycobacterium colombiense	Mycobacterium colombiense CECT 3035	87	84.4 - 89.2	0.03	Mycobacterium colombiense	Mycobacterium colombiense	98.444
CECT 3035(reference)	Mycobacterium colombiense	Mycobacterium colombiense CECT 3035	100	100.0 - 100.0	0	Mycobacterium colombiense	Mycobacterium colombiense	100
TKK-01-0051	Mycobacterium colombiense	Mycobacterium colombiense CECT 3035	81.3	78.4 - 83.9	0.35	Mycobacterium colombiense	Mycobacterium colombiense	97.7951
852002-51834_SCH5396731	Mycobacterium colombiense_A	Mycobacterium colombiense CECT 3035	47.1	44.5 - 49.7	0.86	Mycobacterium colombiense	Mycobacterium colombiense_A	92.6173
E2464	Mycobacterium colombiense_B	Mycobacterium colombiense CECT 3035	47	44.4 - 49.6	0.75	Mycobacterium colombiense	Mycobacterium colombiense_B	92.4993
E1334	Mycobacterium colombiense_C	Mycobacterium colombiense CECT 3035	46.4	43.8 - 48.9	0.53	Mycobacterium colombiense	Mycobacterium colombiense_C	92.386
1.2115e+06	Mycobacterium colombiense_B	Mycobacterium colombiense CECT 3035	47.2	44.7 - 49.8	0.66	Mycobacterium colombiense	Mycobacterium colombiense_B	92.4785
1.24576e+06	Mycobacterium colombiense_B	Mycobacterium colombiense CECT 3035	47.3	44.7 - 49.9	0.61	Mycobacterium colombiense	Mycobacterium colombiense_B	92.597
1.24583e+06	Mycobacterium colombiense_B	Mycobacterium colombiense CECT 3035	47.5	44.9 - 50.1	0.66	Mycobacterium colombiense	Mycobacterium colombiense_B	92.4942
1.16592e+06	Mycobacterium colombiense_B	Mycobacterium colombiense CECT 3035	47.4	44.8 - 50.0	0.57	Mycobacterium colombiense	Mycobacterium colombiense_B	92.5532
1164983	Mycobacterium colombiense_B	Mycobacterium colombiense CECT 3035	47.1	44.6 - 49.7	0.66	Mycobacterium colombiense	Mycobacterium colombiense_B	92.5524
1.2452e+06	Mycobacterium colombiense_B	Mycobacterium colombiense CECT 3035	47.4	44.8 - 50.0	0.56	Mycobacterium colombiense	Mycobacterium colombiense_B	92.6134
1137323	Mycobacterium colombiense_B	Mycobacterium colombiense CECT 3035	47.7	45.1 - 50.3	0.87	Mycobacterium colombiense	Mycobacterium colombiense_B	92.626
NS-7390	Mycobacterium colombiense_B	Mycobacterium colombiense CECT 3035	46.8	44.3 - 49.4	0.57	Mycobacterium colombiense	Mycobacterium colombiense_B	92.5427
IS-1176	Mycobacterium colombiense_B	Mycobacterium colombiense CECT 3035	46.9	44.3 - 49.5	0.52	Mycobacterium colombiense	Mycobacterium colombiense_B	92.466
IS-2214	Mycobacterium colombiense_B	Mycobacterium colombiense CECT 3035	47	44.4 - 49.6	0.53	Mycobacterium colombiense	Mycobacterium colombiense_B	92.4808
IS-576	Mycobacterium colombiense_B	Mycobacterium colombiense CECT 3035	46.9	44.3 - 49.5	0.6	Mycobacterium colombiense	Mycobacterium colombiense_B	92.5235
230	Mycobacterium colombiense	Mycobacterium colombiense CECT 3035	82.4	79.5 - 84.9	0.15	Mycobacterium colombiense	Mycobacterium colombiense	97.9225
CIP108962T	Mycobacterium colombiense	Mycobacterium colombiense CECT 3035	100	99.9 - 100.0	0	Mycobacterium colombiense	Mycobacterium colombiense	99.9853
ANI, Average nucleotide identity; TYGS, Type Strain Genome Server; dDDH, digital DNA-DNA hybridization; C.I., Confidental Interval

## Sheet: Supplementary Table 2
Supplementary Table 2 An overview of 12 Mycobacterium colombiense isolates from three Thai patients and 18 M. colombiense genomes retrived from NCBI analyzed in this study.
Sample ID	Age (years)	Gender	Sample source	Host	Collection date (d/m/y)	Organism	Country	Completeness (%)	Contamination (%)	Genome size (bp)	Number of contigs	Contig N50 (bp)	Contig L50	GC content (%)	Reference accession
MCO062281265	36	Female	NA	Homo sapiens	2022-08-06	Mycobacterium colombiense	Thailand	99.94	0	5749731	12	5744256	1	68.01	SRR33823402
MCO102081859	47	Male	Sputum	Homo sapiens	27/10/2020	Mycobacterium colombiense	Thailand	99.94	0	5602039	3	5599316	1	68.09	SRR33823401
MCO021680268	79	Female	Fluid	Homo sapiens	2016-02-02	Mycobacterium colombiense	Thailand	99.94	0	5747785	5	5740878	1	67.97	SRR33823398
MCO031580717	44	Male	Wound swab	Homo sapiens	2015-03-10	Mycobacterium colombiense	Thailand	99.94	0	5892330	3	5888367	1	67.85	SRR33823397
MCO051681085	45	Male	Elbow (pus)-left	Homo sapiens	2016-05-05	Mycobacterium colombiense	Thailand	99.94	0	5892050	3	5888087	1	67.85	SRR33823396
MCO051681160	45	Male	Synovial fluid	Homo sapiens	13/5/2016	Mycobacterium colombiense	Thailand	99.94	0	5892002	3	5888039	1	67.85	SRR33823395
MCO051681265	28	Male	Sputum	Homo sapiens	25/5/2016	Mycobacterium colombiense	Thailand	99.94	0	5746932	3	5649464	1	67.96	SRR33823394
MCO061681546	28	Male	Tissue	Homo sapiens	24/6/2016	Mycobacterium colombiense	Thailand	99.94	0	5726541	3	5123345	1	67.96	SRR33823393
MCO061481970	43	Male	Chest (pus)	Homo sapiens	2014-07-06	Mycobacterium colombiense	Thailand	99.94	0	5891326	3	5887363	1	67.85	SRR33823392
MCO061481978	43	Male	Inguinal abscess	Homo sapiens	2014-09-06	Mycobacterium colombiense	Thailand	99.94	0	5890968	3	5887005	1	67.85	SRR33823391
MCO101582585	66	Male	Sputum	Homo sapiens	2015-05-10	Mycobacterium colombiense	Thailand	99.94	0	5750826	5	5740878	1	67.97	SRR33823400
MCO121383869	27	Female	Sputum	Homo sapiens	2013-06-12	Mycobacterium colombiense	Thailand	99.94	0	5638640	3	5634808	1	68.06	SRR33823399
CECT 3035(reference)	NA	NA	Blood	Homo sapiens	2006	Mycobacterium colombiense	Colombia	99.94	0	5578571	4	5576643	1	68.09	GCA_000222105.4
TKK-01-0051	NA	NA	Bodily fluid	Homo sapiens	22/5/2009	Mycobacterium colombiense	South Africa	99.94	0.5	6044235	2	6042881	1	67.73	GCA_000661085.1
852002-51834_SCH5396731	NA	NA	NA	NA	2011	Mycobacterium colombiense	South Africa	99.94	0.47	5555215	33	5494652	1	67.22	GCA_001665835.1
E2464	NA	NA	NA	NA	2010	Mycobacterium colombiense	Cambodia	99.94	0.49	5826525	50	5745615	1	67.34	GCA_001667905.1
E1334	NA	NA	NA	NA	2010	Mycobacterium colombiense	Cambodia	99.94	1.37	5561780	37	5505303	1	67.55	GCA_001672755.1
1.2115e+06	2	Female	NA	NA	11/5/2012	Mycobacterium colombiense	Mozambique	99.28	1.09	5844955	116	5695033	1	67.43	GCA_001673005.1
1.24576e+06	NA	NA	NA	NA	21/5/2012	Mycobacterium colombiense	Mozambique	99.28	1.61	5668613	76	5546326	1	67.48	GCA_001673015.1
1.24583e+06	2	Male	NA	NA	6/6/2012	Mycobacterium colombiense	Mozambique	99.78	2.13	5758743	48	5684243	1	67.42	GCA_001673075.1
1.16592e+06	1	Male	NA	NA	3/7/2012	Mycobacterium colombiense	Mozambique	99.9	2.78	5705292	77	5616652	1	67.52	GCA_001673085.1
1164983.0	2	Female	NA	NA	29/8/2012	Mycobacterium colombiense	Mozambique	99.61	1.36	5729797	53	5592831	1	67.42	GCA_001673175.1
1.2452e+06	1	Female	NA	NA	3/8/2012	Mycobacterium colombiense	Mozambique	99.5	1.16	5643029	53	5592831	1	67.52	GCA_001673195.1
1137323.0	3	Male	NA	NA	23/8/2012	Mycobacterium colombiense	Mozambique	99.28	0.98	5967299	42	5648100	1	67.21	GCA_001673505.1
NS-7390	NA	Female	NA	NA	16/4/2010	Mycobacterium colombiense	India	99.78	0.61	5615519	20	5583716	1	67.51	GCA_001953985.1
IS-1176	18 months	Male	NA	NA	4/11/2008	Mycobacterium colombiense	India	99.61	0.53	5566184	46	5522015	1	67.56	GCA_001954055.1
IS-2214	10 months	Male	NA	NA	8/5/2009	Mycobacterium colombiense	India	99.28	0.9	5572614	34	5517866	1	67.55	GCA_001954075.1
IS-576	6 months	Male	NA	NA	17/7/2008	Mycobacterium colombiense	India	99.94	0.69	5787997	31	5553009	1	67.48	GCA_001954115.1
230	NA	NA	Skin (secretion)	Homo sapiens	7/12/2021	Mycobacterium colombiense	China	99.94	0	5669125	10	5606113	1	67.94	GCA_023218095.1
CIP108962T	NA	NA	NA	NA	NA	Mycobacterium colombiense	France	99.94	0	5571935	93	5625163	1	68.08	GCA_965137175.1
NA, not applicable

## Sheet: Supplementary Table 3
Supplementary Table 3 Genes associated with antibiotic resistance genes (ARGs) and virulence factors detected using different databases of of Mycobacterium colombiense isolates.
Isolate ID	BV-BRC																																								Abricate (CARD)				RGI-CARD		Abricate (VFDB)
Gene	KatG	Alr	Ddl	dxr	EF-G	EF-Tu	EmbA	EmbB	EmbC	folA	Dfr	gyrA	gyrB	inhA	fabI	Iso-tRNA	kasA	MurA	rho	rpoB	rpoC	S10p	S12p	MfpA	FabG	HtdX	Rv2671	MmpL5	Rv1634	Rv2994	gidB	GdpD	PgsA	EmbR	EthR	LpqB	MarR	MtrA	MtrB	OxyR	efpA	RbpA	rpoB2	mtrA	RbpA	qacJ	esxH	esxM	esxN
MCO062281265	+	+	+	+	+	+	+	+	+	+	+	+	+	+	+	+	+	+	+	+	-	-	-	+	+	+	+	+	+	-	+	+	+	+	+	+	+	+	+	+	+	+	+	+	+	+	+	+	+
MCO102081859	+	+	+	+	+	+	+	+	+	+	+	+	+	+	+	+	+	+	+	+	+	+	+	+	+	+	+	+	+	-	+	+	+	+	+	+	+	+	+	+	+	+	+	+	+	+	+	+	+
MCO021680268	+	+	+	+	+	+	+	+	+	+	+	+	+	+	+	+	+	+	+	+	+	+	+	+	+	+	+	+	+		+	+	+	+	+	+	+	+	+	+	+	+	+	+	+	+	+	+	+
MCO031580717	+	+	+	+	+	+	+	+	+	+	+	+	+	+	+	+	+	+	+	+	+	+	+	+	+	+	+	+	+	-	+	+	+	+	+	+	+	+	+	+	+	+	+	+	+	+	+	+	+
MCO051681085	+	+	+	+	+	+	+	+	+	+	+	+	+	+	+	+	+	+	+	+	+	+	+	+	+	+	+	+	+	-	+	+	+	+	+	+	+	+	+	+	+	+	+	+	+	+	+	+	+
MCO051681160	+	+	+	+	+	+	+	+	+	+	+	+	+	+	+	+	+	+	+	+	+	+	+	+	+	+	+	+	+	-	+	+	+	+	+	+	+	+	+	+	+	+	+	+	+	+	+	+	+
MCO051681265	+	+	+	+	+	+	+	+	+	+	+	+	+	+	+	+	+	+	+	+	+	+	+	+	+	+	+	+	+	+	+	+	+	+	+	+	+	+	+	+	+	+	+	+	+	+	+	+	+
MCO061681546	+	+	+	+	+	+	+	+	+	+	+	+	+	+	+	+	+	+	+	+	+	+	+	+	+	+	+	+	+	+	+	+	+	+	+	+	+	+	+	+	+	+	+	+	+	+	+	+	+
MCO061481970	+	+	+	+	+	+	+	+	+	+	+	+	+	+	+	+	+	+	+	+	+	+	+	+	+	+	+	+	+	-	+	+	+	+	+	+	+	+	+	+	+	+	+	+	+	+	+	+	+
MCO061481978	+	+	+	+	+	+	+	+	+	+	+	+	+	+	+	+	+	+	+	+	+	+	+	+	+	+	+	+	+	-	+	+	+	+	+	+	+	+	+	+	+	+	+	+	+	+	+	+	+
MCO101582585	+	+	+	+	+	+	+	+	+	+	+	+	+	+	+	+	+	+	+	+	+	+	+	+	+	+	+	+	+	+	+	+	+	+	+	+	+	+	+	+	+	+	+	+	+	+	+	+	+
MCO121383869	+	+	+	+	+	+	+	+	+	+	+	+	+	+	+	+	+	+	+	+	+	+	+	+	+	+	+	+	+	+	+	+	+	+	+	+	+	+	+	+	+	+	+	+	+	+	+	+	+
[truncated: 17 more columns]

## Sheet: Supplementary Table 4
Supplementary Table 4 Nucleic acid mutations associated with clarithromycin, linezolid, and moxifloxacin resistance in Mycobacterium colombiense clinical isolates.
Clarithromycin			Susceptible						Intermediate	Resistance
Gene	POS	REF	MCO121383869	MCO101582585	MCO061681546	MCO051681265	MCO061481978	MCO061481970	MCO021680268	MCO031580717	MCO051681160	MCO051681085
rrl	95	G		T	T	T	T	T	T	T	T	T
rrl	1149	G					A	A		A	A	A
rrl	1280	T		C	C	C	C	C	C	C	C	C
rrl	2080	T		C	C	C	C	C	C	C	C	C
rrl	2270	A								G	C	C
Linezolid			Intermediate	Resistance
Gene	POS	REF	MCO121383869	MCO021680268	MCO031580717	MCO051681085	MCO051681160	MCO051681265	MCO061681546	MCO061481970	MCO061481978	MCO101582585
rplC	216	C		G				G	G			G
rplC	240	T	C	C	C	C	C	C	C	C	C	C
rplC	241	T	C	C	C	C	C	C	C	C	C	C
rplC	264	C	T	T				T	T			T
rplC	273	T	C	C	C	C	C	C	C	C	C	C
rplC	591	C	G	G	G	G	G	G	G	G	G	G
rplD	96	C	T	T	T	T	T	T	T	T	T	T
rplD	207	C	T	T	T	T	T	T	T	T	T	T
rplD	309	C			T	T	T			T	T
rplD	411	C	G	G	G	G	G	G	G	G	G	G
rplD	447	T	G	G	G	G	G	G	G	G	G	G
rplD	489	G		C				C	C			C
rplD	621	T	C	C	C	C	C	C	C	C	C	C
rplD	653	T	C	C	C	C	C	C	C	C	C	C
Moxifloxacin			Resistance
Gene	POS	REF	MCO021680268	MCO031580717	MCO051681085	MCO051681160	MCO051681265	MCO061681546	MCO061481970	MCO061481978	MCO101582585	MCO121383869
gyrA	54	C	G	G	G	G	G	G	G	G	G
gyrA	144	C	T	T	T	T	T	T	T	T	T
gyrA	183	C	T	T	T	T	T	T	T	T	T
gyrA	216	G	C	C	C	C	C	C	C	C	C
gyrA	234	G	C	C	C	C	C	C	C	C	C
gyrA	357	A	G				G	G			G
gyrA	381	C	G				G	G			G
gyrA	477	T	C	C	C	C	C	C	C	C	C
gyrA	486	G	A	A	A	A	A	A	A	A	A	A
gyrA	543	C	G	G	G	G	G	G	G	G	G
gyrA	639	A	G	G	G	G	G	G	G	G	G
gyrA	653	C										T
gyrA	693	C	A				A	A			A
gyrA	696	C	T	T	T	T	T	T	T	T	T
gyrA	792	A	G	G	G	G	G	G	G	G	G	G
gyrA	795	C										T
gyrA	804	G	C	C	C	C	C	C	C	C	C	C
gyrA	822	A	G	G	G	G	G	G	G	G	G	G
gyrA	861	G										T
gyrA	1023	C	T				T	T			T
gyrA	1056	C		G	G	G			G	G
gyrA	1107	C		T	T	T			T	T
gyrA	1143	G	C				C	C			C
gyrA	1230	T	C	C	C	C	C	C	C	C	C
gyrA	1242	G	C	C	C	C	C	C	C	C	C
gyrA	1248	A	G	G	G	G	G	G	G	G	G
gyrA	1273	T	C	C	C	C	C	C	C	C	C
gyrA	1341	C	G	G	G	G	G	G	G	G	G
gyrA	1357	G	A	A	A	A	A	A	A	A	A
gyrA	1398	G	A				A	A			A
gyrA	1407	C	T	T	T	T	T	T	T	T	T
gyrA	1503	G	C	C	C	C	C	C	C	C	C
gyrA	1512	T										C
gyrA	1524	C	T	T	T	T	T	T	T	T	T
gyrA	1602	C	G	G	G	G	G	G	G	G	G
gyrA	1653	A	G	G	G	G	G	G	G	G	G
gyrA	1698	C	T	T	T	T	T	T	T	T	T
gyrA	1704	C	T	T	T	T	T	T	T	T	T
gyrA	1740	C	G	G	G	G	G	G	G	G	G
gyrA	1806	C	A	A	A	A	A	A	A	A	A
gyrA	1905	A	G	G	G	G	G	G	G	G	G	G
gyrA	1911	G										A
gyrA	1993	T	C	C	C	C	C	C	C	C	C	C
gyrA	2020	C		T	T	T			T	T
gyrA	2025	C	T	G	G	G	T	T	G	G	T
gyrA	2049	T	G	G	G	G	G	G	G	G	G	G
gyrA	2064	C	T	T	T	T	T	T	T	T	T
gyrA	2115	G		A	A	A			A	A
gyrA	2154	C	T	T	T	T	T	T	T	T	T
gyrA	2157	C	T	T	T	T	T	T	T	T	T
gyrA	2205	C		G	G	G			G	G
gyrA	2349	C	G	G	G	G	G	G	G	G	G
gyrA	2385	C		T	T	T			T	T
gyrA	2388	C	G	G	G	G	G	G	G	G	G
gyrA	2397	G	C	C	C	C	C	C	C	C	C	C
gyrA	2403	C		T	T	T	T		T	T
gyrA	2424	T	C	C	C	C	C	C	C	C	C
gyrA	2437	C	T				T	T			T
gyrA	2493	C		T	T	T			T	T
gyrA	2497	G	A	A	A	A	A	A	A	A	A
gyrA	2511	G	C	C	C	C	C	C	C	C	C
gyrB	216	C		T	T	T			T	T
gyrB	240	T	C	C	C	C	C	C	C	C	C
gyrB	270	G	C	C	C	C	C	C	C	C	C
gyrB	318	C	T	T	T	T	T	T	T	T	T
gyrB	357	C										T
gyrB	387	G										C
gyrB	399	C										G
gyrB	402	C										G
gyrB	489	T										C
gyrB	543	C										T
gyrB	555	C	T	T	T	T	T	T	T	T	T
gyrB	576	C	T	T	T	T	T	T	T	T	T
gyrB	586	T	C	C	C	C	C	C	C	C	C
gyrB	615	G	A	A	A	A	A	A	A	A	A
gyrB	651	T	C	C	C	C	C	C	C	C	C
gyrB	693	G	T	T	T	T	T	T	T	T	T
gyrB	741	A	G	G	G	G	G	G	G	G	G	G
gyrB	744	T										C
gyrB	749	A	G				G	G			G	G
gyrB	756	T	C	C	C	C	C	C	C	C	C	C
gyrB	759	C	T				T	T			T
gyrB	852	C	T	T	T	T	T	T	T	T	T
gyrB	894	C	T				T	T			T
gyrB	909	G	C				C	C			C
gyrB	981	G		C	C	C			C	C
gyrB	984	G	C				C	C			C
gyrB	1020	C	G	G	G	G	G	G	G	G	G
gyrB	1101	G		A	A	A			A	A
gyrB	1176	A		G	G	G			G	G
gyrB	1239	G	C				C	C			C
gyrB	1254	C										G
gyrB	1266	C		G	G	G			G	G
gyrB	1269	C	A				A	A			A
gyrB	1311	G		A	A	A			A	A
gyrB	1332	C		G	G	G			G	G
gyrB	1341	C		T	T	T			T	T
gyrB	1356	G		A	A	A			A	A
gyrB	1386	C	T	T	T	T	T	T	T	T	T
gyrB	1389	T	C	C	C	C	C	C	C	C	C
gyrB	1398	C		T	T	T			T	T
gyrB	1401	T		C	C	C			C	C
gyrB	1413	C		T	T	T			T	T
gyrB	1437	C		G	G	G			G	G
gyrB	1512	C	T	T	T	T	T	T	T	T	T
gyrB	1533	A	G	G	G	G	G	G	G	G	G	G
gyrB	1542	C		T	T	T			T	T
gyrB	1545	C		T	T	T			T	T
gyrB	1551	C	T				T	T			T
gyrB	1554	A	G	G	G	G	G	G	G	G	G
gyrB	1564	A	G	G	G	G	G	G	G	G	G
gyrB	1575	T	C	C	C	C	C	C	C	C	C
gyrB	1629	G	A				A	A			A
gyrB	1737	T	C				C	C			C
gyrB	1749	C		T	T	T			T	T
gyrB	1761	T	C	C	C	C	C	C	C	C	C
gyrB	1812	T	C	C	C	C	C	C	C	C	C	C
gyrB	1827	C		T	T	T			T	T
gyrB	1893	T	C	C	C	C	C	C	C	C	C
gyrB	1965	C		G	G	G			G	G
gyrB	1968	G	A	A	A	A	A	A	A	A	A

## Sheet: Supplementary Table 5
Supplementary Table 5 Amino acid substitutions associated with linezolid and moxifloxacin resistance in Mycobacterium colombiense clinical isolates.
Linezolid			Intermediate	Resistance
Portein	POS	REF	MCO121383869	MCO021680268	MCO031580717	MCO051681085	MCO051681160	MCO051681265	MCO061681546	MCO061481970	MCO061481978	MCO101582585
L3	218	V	A	A	A	A	A	A	A	A	A	A
Moxifloxacin			Resistance
Protein	POS	REF	MCO021680268	MCO031580717	MCO051681085	MCO051681160	MCO051681265	MCO061681546	MCO061481970	MCO061481978	MCO101582585	MCO121383869
GryA	218	A										V
GryA	453	V	I	I	I	I	I	I	I	I	I
GryA	833	G	S	S	S	S	S	S	S	S	S
GryB	250	H		R	R	R			R	R
GryB	522	T	A	A	A	A	A	A	A	A	A

## Sheet: Supplementary Table 6
Supplementary Table 6 SNP distance matric of core-SNPs and core-SNPs with removed recombination.
Core-SNPs by Snippy
	MCO062281265	MCO102081859	MCO021680268	MCO031580717	MCO051681085	MCO051681160	MCO051681265	MCO061681546	MCO061481970	MCO061481978	MCO101582585	MCO121383869
MCO062281265	0	22787	98738	85747	86085	86026	99345	99315	86065	86066	98700	65263
MCO102081859	22787	0	102129	88225	88576	88503	102686	102657	88543	88551	102089	67219
MCO021680268	98738	102129	0	46483	46407	46396	117	102	46415	46417	61	61603
MCO031580717	85747	88225	46483	0	317	319	48427	48413	320	327	46591	64433
MCO051681085	86085	88576	46407	317	0	12	48359	48353	16	28	46522	64379
MCO051681160	86026	88503	46396	319	12	0	48348	48342	17	32	46515	64359
MCO051681265	99345	102686	117	48427	48359	48348	0	59	48365	48364	86	62823
MCO061681546	99315	102657	102	48413	48353	48342	59	0	48362	48357	79	62820
MCO061481970	86065	88543	46415	320	16	17	48365	48362	0	21	46529	64345
MCO061481978	86066	88551	46417	327	28	32	48364	48357	21	0	46528	64360
MCO101582585	98700	102089	61	46591	46522	46515	86	79	46529	46528	0	61721
MCO121383869	65263	67219	61603	64433	64379	64359	62823	62820	64345	64360	61721	0
Core-SNPs with removed recombination by Snippy followed by Gubbins
	MCO062281265	MCO102081859	MCO021680268	MCO031580717	MCO051681085	MCO051681160	MCO051681265	MCO061681546	MCO061481970	MCO061481978	MCO101582585	MCO121383869
MCO062281265	0	7598	61512	54599	54822	54821	61720	61717	54817	54810	61542	39287
MCO102081859	7598	0	71716	63148	63372	63363	71969	71957	63368	63367	71771	46732
MCO021680268	61512	71716	0	34235	34359	34365	55	57	34358	34362	31	51021
MCO031580717	54599	63148	34235	0	4	9	35842	35825	4	9	34349	52145
MCO051681085	54822	63372	34359	4	0	6	35964	35952	3	10	34476	52276
MCO051681160	54821	63363	34365	9	6	0	35966	35957	9	16	34482	52264
MCO051681265	61720	71969	55	35842	35964	35966	0	31	35966	35968	44	51976
MCO061681546	61717	71957	57	35825	35952	35957	31	0	35954	35956	50	51950
MCO061481970	54817	63368	34358	4	3	9	35966	35954	0	7	34479	52262
MCO061481978	54810	63367	34362	9	10	16	35968	35956	7	0	34482	52260
MCO101582585	61542	71771	31	34349	34476	34482	44	50	34479	34482	0	51183
MCO121383869	39287	46732	51021	52145	52276	52264	51976	51950	52262	52260	51183	0
